# Supplementary material for: Endoglin and Other Angiogenesis Markers on Recurrent Varicose Veins
Source: Preprints.org preprint supplement (doi:10.20944/preprints202203.0055.v1), 2022-03-03
Supplement: Supplementary file 1 [file supplementary]

## 382 SUPPLEMENTARY MATERIAL

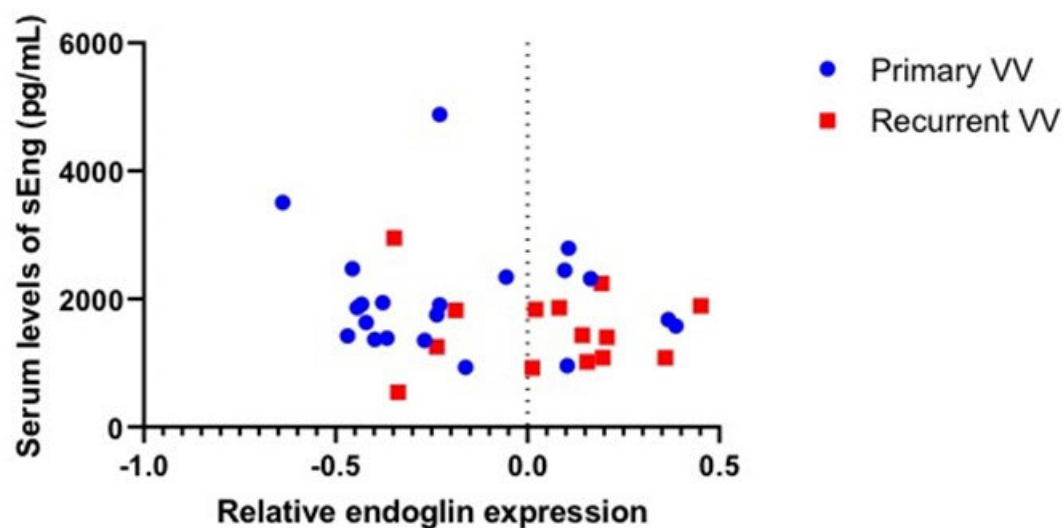

383

384 **Figure 1S.** Correlation between relative endoglin expression in tissue and serum levels of soluble endoglin  
385 (pg/mL), by groups. Not statistically significant.

386
